# Supplementary material for: Analysis of Gene Expression Profiles of Soft Tissue Sarcoma Using a Combination of Knowledge-Based Filtering with Integration of Multiple Statistics
Source: PubMed Central journal article supplement (PMC4154757; doi:10.1371/journal.pone.0106801), 2014-09-04
Supplement: pone.0106801.s010.pdf [file pone.0106801.s010.pdf]

# Supplementary Information

## Supplementary Discussion

In the present study, we conducted a simulation based on a permutation test to extract genes that are both diagnostic markers (for discrimination of histological subtypes) and prognostic markers (for overall survival in STS). As shown in Table 2, 25 genes were extracted, and their adjusted  $p$  values were statistically significant (adjusted  $p < 0.05$ ). We analyzed studies related to these 25 genes and found many reports suggesting that these 25 genes are effective prognostic/predictive factors or therapeutic targets, as shown in Supplementary Table S7. Among the 25 genes, 8 genes were extracted using Welch's  $t$  test to compare UPS and MFS ( $q < 0.05$ ). Four of these genes, *MIF*, *SCD1*, *ENO1/MBP1*, and *P4HA1*, were also extracted in our previous study [1]. Among the 4 genes, *MIF* and *SCD1* are potential prognostic/predictive markers and/or therapeutic targets not only for UPS but also for other cancers [2-26].

*MIF* expression is induced by HIF-1 under hypoxia [27,28]. Secreted *MIF* interacts with the cell surface molecule CD74 [29]. CD74 lacks a signal-transducing intracellular domain but interacts with the proteoglycan CD44 and mediates signaling via CD44 to activate Src-family kinase and mitogen-activated protein kinase (MAPK)/extracellular signal-regulated kinase (ERK), either to stimulate the phosphatidylinositol 3-kinase (PI3K)/Akt pathway or to initiate the p53-dependent inhibition of apoptosis [30]. *MIF* can also promote invasion and metastasis via G-protein-coupled chemokine receptors (CXCR2, CXCR4, and CXCR7) [22,31,32]. Furthermore, *MIF* activates *HIF-1 $\alpha$*  expression in a p53-dependent manner [33]. *MIF* promotes not only tumor metastasis [1,12,19,21,22] but also apoptosis [34,35], cell growth [10,18], and angiogenesis [2,3,36]. *SCD1* expression is also induced by hypoxia [37]. *SCD1* and *HIF-2 $\alpha$*  are overexpressed in clear cell renal cell

1 carcinoma under hypoxia; they synergistically inhibit apoptosis and promote cell migration  
2 [38]. Hypoxia-induced SCD1 activates the Akt pathway via regulation of the  $\Delta 9$   
3 monounsaturated fatty acid (MUFA)/saturated fatty acid (SFA) balance in mammalian cells  
4 [37,39,40].

5 The 2 remaining genes, *ENO1/MBP1* and *P4HA1*, also showed statistical  
6 significance, not only for UPS vs. MFS but also for UPS vs. SS and for UPS vs. MLS, as  
7 shown in Table 4 and Fig. 6. Recent studies have revealed that *ENO1/MBP1* and *P4HA1* are  
8 target genes of hypoxia-inducible factor 1 (*HIF-1*) [41,42]. Furthermore, *ENO1/MBP1* is a  
9 repressor of *MYC* [43], a prognostic marker for many cancers [44-49] and a therapeutic target  
10 in breast cancer (in combination with radiation therapy) [50]. Knockdown of *ENO1/MBP1*  
11 inhibits hypoxic cell growth in clear cell ovarian cancer [51]. Hypoxia-induced *P4HA1*,  
12 *P4HA2*, and procollagen-lysine,2-oxoglutarate 5-dioxygenase 2 (*PLOD2*) promote  
13 invasiveness and metastasis by altering the composition, alignment, and mechanical  
14 properties of the extracellular matrix (ECM) [41]. *P4HA1* and *P4HA2* encode collagen  
15 prolyl hydroxylases that are essential for cancer invasion and metastasis [52]. Among our  
16 25 genes, *P4HA1* showed the strongest association with the histological grade ( $\rho = 0.449$ ,  $p =$   
17  $1.12 \times 10^{-5}$ ) and with metastasis ( $\rho = 0.424$ ,  $p = 3.89 \times 10^{-5}$ ), as shown in Table 3. These  
18 results suggest that the malignancy of UPS depends on the activation of genes downstream of  
19 *HIFs* under hypoxic conditions. A study of the relationship between a hypoxia-induced  
20 transcription profile and the metastatic potential of STS has been published [53]. In the  
21 present study, we enriched the set of potential disease-associated genes by combining  
22 knowledge-based filtering with a simulation based on the integration of multiple statistics.

23 Among the 8 genes selected by Welch's *t* test (comparison of UPS with MFS), 4 genes,  
24 that is, *MIF*, *SCD1*, *ENO1*, and *P4HA1*, had been extracted in our previous study [1]. The 4  
25 remaining genes, that is, *PRDX1*, *CD34*, *FAM162A/HGTD-P*, and *PTK7*, have not been

1 extracted by comparison of UPS with MFS in any previous study. CD34 has been used  
2 successfully for the differential diagnosis (immunohistochemical analysis) of STS [54].  
3 CD34 is also a marker for progenitor and stem cells [55,56] and vascular endothelial cells  
4 [57]. Therefore, CD34 will likely be a useful prognostic marker in some cancers [58-62].  
5 *PRDX1* encodes a member of the peroxiredoxin family of antioxidant enzymes. *PRDX1*  
6 interacts with the cellular oncogene products c-Abl and c-Myc and inhibits c-Abl kinase  
7 activity [63] and Myc-mediated transformation [64], independent of its antioxidant activity.  
8 Thus, *PRDX1* acts as a tumor suppressor. In addition, *PRDX1* promotes nuclear factor  
9 kappa B (NF- $\kappa$ B) activity, which induces the expression of HIF-1 $\alpha$  via toll-like receptor 4  
10 (TLR4) in prostate cancer [65]. NF- $\kappa$ B directly binds to the *HIF-1 $\alpha$*  promoter [66]. Many  
11 studies suggest that *PRDX1* is a useful prognostic marker in various cancers [67-71], but there  
12 are no data for STS in this regard. In the present study, *PRDX1* showed statistical  
13 significance not only for UPS vs. MFS but also for UPS vs. SS and UPS vs. MLS, as shown  
14 in Table 4 and Fig. 6.

15 *FAM162A/HGTD-P* is a HIF-1 target gene and is an indispensable mediator of the  
16 mitochondrial apoptotic pathway [72,73]. *PTK7* is a regulator of noncanonical WNT/planar  
17 cell polarity (PCP) signaling [74]. *PTK7* also inhibits canonical Wnt/ $\beta$ -catenin signaling  
18 [75,76]. *PTK7* is upregulated in many cancers, and knockdown of *PTK7* in colon carcinoma  
19 cells inhibits cell proliferation and induces caspase 10-dependent apoptosis via the  
20 mitochondrial pathway [77]. Many studies suggest that *PTK7* is a useful  
21 prognostic/predictive marker and/or therapeutic target in various cancers [77-84].

22 When CINSARC was compared with our 25 genes, 4 common genes, *PTTG1*, *ASPM*,  
23 *CDC20*, and *KIF20A/MKlp2*, were extracted, as shown in Fig. 4. *PTTG1*, *ASPM*, and  
24 *CDC20* are downstream of breast cancer susceptibility gene 1 (*BRCA1*) [85]. Knockdown of  
25 *BRCA1* with small interfering RNA (siRNA) downregulates multiple genes implicated in

1 chromosome segregation (e.g., *PTTG1*), centrosome function (e.g., *ASPM*), and progression  
2 into and through mitosis (e.g., *CDC20*) in human prostate (DU-145) and breast (MCF-7)  
3 cancer cells [85]. *PTTG1* is a proto-oncogene originally cloned from a rat pituitary tumor  
4 [86]. *PTTG1* encodes a protein that interacts with p53, modulates p53-mediated  
5 transcriptional activity and apoptosis [87], and prevents the activation of separin, which  
6 induces sister chromatid separation in the transition from metaphase to anaphase [88]. Many  
7 studies suggest that *PTTG1* is a useful prognostic/predictive marker and/or therapeutic target  
8 in various cancers [89-98].

9 *ASPM* is the putative human ortholog of the *Drosophila melanogaster* abnormal  
10 spindle gene (*Asp*), which is involved in mitosis [99] and DNA repair [100]. Many studies  
11 suggest that *ASPM* is a useful prognostic/predictive marker and/or therapeutic target in  
12 various cancers [101-106]. *CDC20* is an essential regulator of cell division in humans  
13 [107,108]. *CDC20* is downregulated by p53 [109], and many studies have suggested that  
14 *CDC20* is a useful prognostic/predictive marker and/or therapeutic target in various cancers  
15 [110-116].

16 *KIF20A/MKlp2*, encodes a member of the kinesin superfamily of motor proteins  
17 [117]. *KIF20A/MKlp2* is a mitotic inhibitory target of mitotic arrest deficient 2 (*MAD2*)  
18 and is necessary for proper mitotic progression and cytokinesis [118]. Direct interaction  
19 between *MAD2* and *CDC20* is a key event during the checkpoint activation of spindle  
20 assembly [119]. Inhibition of *KIF20A/MKlp2* induces lysosomal cell death and cell cycle  
21 arrest in the G1 phase in breast cancer cells [120] and G2/M arrest in gastric cancer cells  
22 [121]. Many studies suggest that *KIF20A/MKlp2* is a useful prognostic/predictive marker  
23 and/or therapeutic target in different types of cancer [120-123].

24 These results indicate that the 4 genes common to CINSARC and our analysis are  
25 linked to cell cycle checkpoints. This is logical because CINSARC genes were selected for

1 the prediction of metastasis in STS, and our 25 genes were selected as both diagnostic  
2 markers (for histological subtypes) and prognostic markers of overall survival in STS.  
3 Among the 25 genes, 13 genes remained after using Welch's *t* test to compare UPS and SS or  
4 UPS and MLS ( $q < 0.05$ ): solute carrier family 16, member 1 (*SLC16A1*)/monocarboxylate  
5 transporter 1 (*MCT1*); cell adhesion molecule 1 (*CADM1*)/tumor suppressor in non-small cell  
6 lung cancer 1 (*TSLC1*); trichorhinophalangeal syndrome 1 (*TRPS1*); protein kinase,  
7 DNA-activated, catalytic polypeptide (*PRKDC*)/DNA-dependent protein kinase catalytic  
8 subunit (*DNA-PKcs*); cyclin-dependent kinase 1 (*CDK1*)/cell division cycle protein 2  
9 (*CDC2*); transforming, acidic coiled-coil containing protein 3 (*TACC3*); lysosomal protein  
10 transmembrane 4  $\beta$  (*LAPTM4B*); fibronectin 1 (*FNI*); H2A histone family, member Y  
11 (*H2AFY*)/histone H2A variant (*H2AX*); *STAT1*; caveolin 1 (*CAV1*); caveolin 2 (*CAV2*); and  
12 insulin-like growth factor-binding protein 4 (*IGFBP4*).

13 *SLC16A1/MCT1* encodes a monocarboxylate transporter that drives the movement of  
14 lactate and pyruvate across cell membranes [124]. *SLC16A1/MCT1* counteracts p53  
15 activity at the transcriptional level, and the loss of p53 along with *SLC16A1/MCT1*  
16 overexpression synergistically promotes chromosomal instability and tumorigenicity [125].  
17 Lactate taken up by *SLC16A1/MCT1* activates HIF-1 and triggers tumor angiogenesis and  
18 tumor growth [126,127]. *SLC16A1/MCT1* inhibition has antitumor effects that are  
19 associated with the NF- $\kappa$ B pathway [128]. Many studies suggest that *SLC16A1/MCT1* is a  
20 promising prognostic/predictive marker and/or therapeutic target in various types of cancer  
21 [126,128-135].

22 *CADM1/TSLC1* encodes an immunoglobulin-like cell adhesion molecule with 3  
23 immunoglobulin loops [136]. The ectodomain of *CADM1/TSLC1* mediates intercellular  
24 adhesion through homophilic or heterophilic *trans*-interactions between neighboring cells  
25 [137]. *CADM1/TSLC1* is implicated in cell proliferation, invasion, and apoptosis via

1 regulation of the Akt signaling pathway [138]. Promoter methylation of the *CADM1/TSLC1*  
2 gene is frequently observed in many cancers [139]. *CADM1/TSLC1* is a useful  
3 prognostic/predictive marker and/or therapeutic target because it acts as a tumor suppressor in  
4 various cancers [138,140-143]. In addition, T-cell lymphoma invasion and metastasis 1  
5 (*TIAM1*) integrates signals from *CADM1/TSLC1* to regulate the actin cytoskeleton through  
6 Rac activation, which leads to tissue infiltration by leukemic cells in adult T-cell  
7 leukemia/lymphoma (ATL) [136].

8 *TRPS1* encodes a GATA-type zinc-finger protein [144]. *TRPS1* is a nuclear protein  
9 that binds GATA sequences, and *TRPS1* potently and specifically prevents transcriptional  
10 activation mediated by other GATA factors [144]. *TRPS1* is a crucial regulator of the  
11 mesenchymal-to-epithelial cell transition [145,146]; accordingly, *TRPS1* is a prognostic  
12 marker in breast cancer [145,146] and colon cancer [147].

13 *PRKDC/DNA-PKcs* encodes a member of the phosphatidylinositol 3-kinase-like  
14 kinase (PIKK) family of protein kinases [148]. Ataxia telangiectasia mutated (*ATM*) and  
15 ataxia telangiectasia and Rad3-related (*ATR*) protein also belong to the PIKK family, and  
16 *PRKDC/DNA-PKcs* cooperates with these genes to phosphorylate proteins involved in the  
17 DNA damage checkpoint [149]. Inhibition of *PRKDC/DNA-PKcs* activity prevents binding  
18 of *PRKDC/DNA-PKcs* to p53 on the *p21* promoter [150]. Several studies suggest that  
19 *PRKDC/DNA-PKcs* is a good prognostic/predictive marker and/or therapeutic target in  
20 various cancers [151-153].

21 *CDK1/CDC2* is a serine/threonine kinase that interacts with cyclin B1 (*CCNB1*) to  
22 form a complex known as the maturation-promoting factor (MPF), which is essential for cell  
23 cycle progression through mitosis [154]. Inhibition of *CDK1/CDC2* induces G2/M arrest  
24 [155]. Many studies suggest that *CDK1/CDC2* is a useful prognostic/predictive marker  
25 and/or therapeutic target in various types of cancer [156-160].

1 TACC3 is necessary for the regulation of mitotic spindle assembly and chromosome  
2 segregation [161]. This protein regulates the transcriptional activation of HIF-1 through  
3 interaction with aryl hydrocarbon receptor nuclear translocator (ARNT) (also known as  
4 HIF-1 $\beta$ ) [162]. TACC3 deficiency is associated with a high rate of apoptosis and expression  
5 of the p53 target gene *p21* [163]. Several studies suggest that *TACC3* is a useful  
6 prognostic/predictive marker and/or therapeutic target in various cancers [164-166].

7 *LAPTM4B*, which encodes a protein containing a lysosome localization motif that  
8 localizes to the late endosomes and lysosomes [167], was originally identified as a  
9 hepatocellular carcinoma-associated gene [167]. *LAPTM4B* promotes autophagy and  
10 tolerance to metabolic stress [168], enhances the multidrug resistance of cancer cells by  
11 promoting drug efflux through colocalization and interaction with P glycoprotein (P-gp), and  
12 inhibits apoptosis by activating PI3K/AKT signaling [169]. Many studies suggest that  
13 *LAPTM4B* is a useful prognostic/predictive marker and/or therapeutic target in various  
14 cancers [170-174].

15 *FNI*, a HIF-1 target gene in colon carcinoma [175] and a SRY-related HMG-box  
16 gene 2 (*SOX2*) target gene in ovarian cancer [176], promotes cell migration and invasion in  
17 various cancers [177,178].

18 *H2AFY/H2AX* encodes a histone protein that consists of a histone H2A-like histone  
19 domain and a large, globular C-terminal macrodomain that is not present in other histone  
20 proteins [179]. *H2AFY/H2AX* is required for the repair of DNA double-strand breaks in the  
21 ATM signaling pathway [180], and active expression of *H2AFY/H2AX* ( $\gamma$ H2AX) is an  
22 indicator of DNA double-strand breaks [181]. *H2AFY/H2AX* was found to interact with  
23 human epidermal growth factor receptor 2 (HER2) in cancer cells that overexpress HER2  
24 [182]. *H2AFY/H2AX* has also been shown to interact with tumor suppressor p53-binding  
25 protein 1 (TP53BP1) [183-185], BRCA1 [186-188], and BRCA1-associated RING domain

1 protein 1 (BARD1) [186,188]. The absence of H2AFY/H2AX causes  
2 proteasome-dependent degradation of p21 under conditions of DNA damage [189]. Many  
3 studies have suggested that *H2AFY/H2AX* is a promising prognostic marker in various cancers  
4 [190-193].

5 The protein encoded by *STAT1* was the first identified member of a multigene family  
6 targeted by both the type I and type II interferon (IFN) pathways [194-197]. *STAT1*  
7 maintains cellular homeostasis by controlling cell growth, proliferation, apoptosis, and  
8 immune reactions. Expression and posttranslational aberrations of *STAT1* have been  
9 identified in a variety of human pathological conditions, including cancer [198]. *STAT1*  
10 acetylation depends on the balance between the activity of histone deacetylases (HDACs) and  
11 histone acetyltransferases (HATs). *STAT1* acetylation is involved in the regulation of NF- $\kappa$ B  
12 activity and thus of apoptosis [199]. *STAT1* also directly interacts with p53 to enhance DNA  
13 damage-induced apoptosis [200]. In addition, *STAT1* is downstream of HIF-1; the latter  
14 downregulates the expression of *STAT1* through differentiated embryo-chondrocyte expressed  
15 gene 1 (DEC1)/stimulated by retinoic acid 13 (STRA13) in an HDAC1-dependent manner  
16 [201]. Many studies have suggested that *STAT1* would be an effective prognostic/predictive  
17 marker and/or therapeutic target in various types of cancer [202-207].

18 *CAV1* and *CAV2* are integral membrane proteins that are essential components of  
19 caveolar membranes. They contribute to the negative regulation of tyrosine and  
20 serine/threonine kinase activities by binding to epidermal growth factor receptor (EGFR)  
21 [208]. *CAV1* and *CAV2* modulate downstream signaling, such as RAS/ERK signaling, via a  
22 nonreceptor tyrosine kinase (Src/Fyn/Abl) [209-211]. *CAV2* interacts with *CAV1* [210], and  
23 *CAV1* expression induces the downregulation of MAPK, PI3K/AKT, and mTOR signaling as  
24 well as the activation of apoptotic pathways [212]. Many studies have suggested that *CAV1*  
25 and *CAV2* are useful prognostic markers in various cancers [211-215]. However, these



1 genes might behave either as tumor suppressors or as oncogenes depending on the cell type  
2 and tumor stage/grade [216,217]. In the present study, *CAVI* and *CAV2* expression levels  
3 were negatively associated with the histological grade in STS, as shown in Table 3.

4 *IGFBP4* encodes a protein that is a potent inhibitor of IGF activity [218-220].  
5 *IGFBP4* inhibits IGF-dependent growth and angiogenic effects in glioblastoma [221] and  
6 colorectal cancer [222]. In addition, *IGFBP4* expression activates cell growth, metastasis,  
7 and Wnt/ $\beta$ -catenin signaling in renal cell carcinoma [223]. The expression of *IGFBP4* in  
8 lung adenocarcinomas is downregulated by epigenetic silencing in association with tumor  
9 differentiation, resulting in the disruption of *IGFBP4*-mediated growth inhibition [224]. A  
10 negative correlation between the Ki-67 labeling index and *IGFBP4* expression was reported in  
11 lung adenocarcinoma [224]. This result is consistent with our study results, as shown in  
12 Table 3.

13

## 1 **Supplementary References**

- 2 1. Takahashi H, Nakayama R, Hayashi S, Nemoto T, Murase Y, et al. (2013) Macrophage  
3 migration inhibitory factor and stearoyl-CoA desaturase 1: potential prognostic  
4 markers for soft tissue sarcomas based on bioinformatics analyses. *PLoS One* 8:  
5 e78250.
- 6 2. Cheng RJ, Deng WG, Niu CB, Li YY, Fu Y (2011) Expression of macrophage migration  
7 inhibitory factor and CD74 in cervical squamous cell carcinoma. *Int J Gynecol Cancer*  
8 21: 1004-1012.
- 9 3. Choudhary S, Hegde P, Pruitt JR, Sielecki TM, Choudhary D, et al. (2013) Macrophage  
10 migratory inhibitory factor promotes bladder cancer progression via increasing  
11 proliferation and angiogenesis. *Carcinogenesis* 34: 2891-2899.
- 12 4. Du X, Wang QR, Chan E, Merchant M, Liu J, et al. (2012) FGFR3 stimulates stearoyl CoA  
13 desaturase 1 activity to promote bladder tumor growth. *Cancer Res* 72: 5843-5855.
- 14 5. Fenner A (2013) Kidney cancer: Stearoyl-CoA desaturase: a novel therapeutic target for  
15 RCC. *Nat Rev Urol* 10: 370.
- 16 6. Han I, Lee MR, Nam KW, Oh JH, Moon KC, et al. (2008) Expression of macrophage  
17 migration inhibitory factor relates to survival in high-grade osteosarcoma. *Clin Orthop*  
18 *Relat Res* 466: 2107-2113.
- 19 7. Leung JY, Kim WY (2013) Stearoyl co-A desaturase 1 as a ccRCC therapeutic target:  
20 death by stress. *Clin Cancer Res* 19: 3111-3113.
- 21 8. Mason P, Liang B, Li L, Fremgen T, Murphy E, et al. (2012) SCD1 inhibition causes  
22 cancer cell death by depleting mono-unsaturated fatty acids. *PLoS One* 7: e33823.
- 23 9. Meyer-Siegler KL, Iczkowski KA, Leng L, Bucala R, Vera PL (2006) Inhibition of  
24 macrophage migration inhibitory factor or its receptor (CD74) attenuates growth and  
25 invasion of DU-145 prostate cancer cells. *J Immunol* 177: 8730-8739.

- 1 10. Mittelbronn M, Platten M, Zeiner P, Dombrowski Y, Frank B, et al. (2011) Macrophage  
2 migration inhibitory factor (MIF) expression in human malignant gliomas contributes  
3 to immune escape and tumour progression. *Acta Neuropathol* 122: 353-365.
- 4 11. Noto A, Raffa S, De Vitis C, Roscilli G, Malpicci D, et al. (2013) Stearoyl-CoA  
5 desaturase-1 is a key factor for lung cancer-initiating cells. *Cell Death Dis* 4: e947.
- 6 12. Ren Y, Chan HM, Fan J, Xie Y, Chen YX, et al. (2006) Inhibition of tumor growth and  
7 metastasis in vitro and in vivo by targeting macrophage migration inhibitory factor in  
8 human neuroblastoma. *Oncogene* 25: 3501-3508.
- 9 13. Rendon BE, Roger T, Teneng I, Zhao M, Al-Abed Y, et al. (2007) Regulation of human  
10 lung adenocarcinoma cell migration and invasion by macrophage migration inhibitory  
11 factor. *J Biol Chem* 282: 29910-29918.
- 12 14. Roongta UV, Pabalan JG, Wang X, Ryseck RP, Fagnoli J, et al. (2011) Cancer cell  
13 dependence on unsaturated fatty acids implicates stearoyl-CoA desaturase as a target  
14 for cancer therapy. *Mol Cancer Res* 9: 1551-1561.
- 15 15. Scaglia N, Chisholm JW, Igal RA (2009) Inhibition of stearoylCoA desaturase-1  
16 inactivates acetyl-CoA carboxylase and impairs proliferation in cancer cells: role of  
17 AMPK. *PLoS One* 4: e6812.
- 18 16. Scaglia N, Igal RA (2008) Inhibition of Stearoyl-CoA Desaturase 1 expression in human  
19 lung adenocarcinoma cells impairs tumorigenesis. *Int J Oncol* 33: 839-850.
- 20 17. Schrader J, Deuster O, Rinn B, Schulz M, Kautz A, et al. (2009) Restoration of contact  
21 inhibition in human glioblastoma cell lines after MIF knockdown. *BMC Cancer* 9:  
22 464.
- 23 18. Schulz R, Marchenko ND, Holembowski L, Fingerle-Rowson G, Pesic M, et al. (2012)  
24 Inhibiting the HSP90 chaperone destabilizes macrophage migration inhibitory factor  
25 and thereby inhibits breast tumor progression. *J Exp Med* 209: 275-289.

- 1 19. Simpson KD, Templeton DJ, Cross JV (2012) Macrophage migration inhibitory factor  
2 promotes tumor growth and metastasis by inducing myeloid-derived suppressor cells  
3 in the tumor microenvironment. *J Immunol* 189: 5533-5540.
- 4 20. Sun B, Nishihira J, Suzuki M, Fukushima N, Ishibashi T, et al. (2003) Induction of  
5 macrophage migration inhibitory factor by lysophosphatidic acid: relevance to tumor  
6 growth and angiogenesis. *Int J Mol Med* 12: 633-641.
- 7 21. Sun B, Nishihira J, Yoshiki T, Kondo M, Sato Y, et al. (2005) Macrophage migration  
8 inhibitory factor promotes tumor invasion and metastasis via the Rho-dependent  
9 pathway. *Clin Cancer Res* 11: 1050-1058.
- 10 22. Tarnowski M, Grymula K, Liu R, Tarnowska J, Drukala J, et al. (2010) Macrophage  
11 migration inhibitory factor is secreted by rhabdomyosarcoma cells, modulates tumor  
12 metastasis by binding to CXCR4 and CXCR7 receptors and inhibits recruitment of  
13 cancer-associated fibroblasts. *Mol Cancer Res* 8: 1328-1343.
- 14 23. von Roemeling CA, Marlow LA, Wei JJ, Cooper SJ, Caulfield TR, et al. (2013)  
15 Stearoyl-CoA desaturase 1 is a novel molecular therapeutic target for clear cell renal  
16 cell carcinoma. *Clin Cancer Res* 19: 2368-2380.
- 17 24. Wang XB, Tian XY, Li Y, Li B, Li Z (2012) Elevated expression of macrophage  
18 migration inhibitory factor correlates with tumor recurrence and poor prognosis of  
19 patients with gliomas. *J Neurooncol* 106: 43-51.
- 20 25. Tomiyasu M, Yoshino I, Suemitsu R, Okamoto T, Sugimachi K (2002) Quantification of  
21 macrophage migration inhibitory factor mRNA expression in non-small cell lung  
22 cancer tissues and its clinical significance. *Clin Cancer Res* 8: 3755-3760.
- 23 26. Holder AM, Gonzalez-Angulo AM, Chen H, Akcakanat A, Do KA, et al. (2013) High  
24 stearoyl-CoA desaturase 1 expression is associated with shorter survival in breast  
25 cancer patients. *Breast Cancer Res Treat* 137: 319-327.

- 1 27. Welford SM, Bedogni B, Gradin K, Poellinger L, Broome Powell M, et al. (2006)  
2 HIF1alpha delays premature senescence through the activation of MIF. *Genes Dev* 20:  
3 3366-3371.
- 4 28. Baugh JA, Gantier M, Li L, Byrne A, Buckley A, et al. (2006) Dual regulation of  
5 macrophage migration inhibitory factor (MIF) expression in hypoxia by CREB and  
6 HIF-1. *Biochem Biophys Res Commun* 347: 895-903.
- 7 29. Morand EF, Leech M, Bernhagen J (2006) MIF: a new cytokine link between rheumatoid  
8 arthritis and atherosclerosis. *Nat Rev Drug Discov* 5: 399-410.
- 9 30. Zernecke A, Bernhagen J, Weber C (2008) Macrophage migration inhibitory factor in  
10 cardiovascular disease. *Circulation* 117: 1594-1602.
- 11 31. Dessein AF, Stechly L, Jonckheere N, Dumont P, Monte D, et al. (2010) Autocrine  
12 induction of invasive and metastatic phenotypes by the MIF-CXCR4 axis in  
13 drug-resistant human colon cancer cells. *Cancer Res* 70: 4644-4654.
- 14 32. Bernhagen J, Krohn R, Lue H, Gregory JL, Zernecke A, et al. (2007) MIF is a noncognate  
15 ligand of CXC chemokine receptors in inflammatory and atherogenic cell recruitment.  
16 *Nat Med* 13: 587-596.
- 17 33. Oda S, Oda T, Nishi K, Takabuchi S, Wakamatsu T, et al. (2008) Macrophage migration  
18 inhibitory factor activates hypoxia-inducible factor in a p53-dependent manner. *PLoS*  
19 *One* 3: e2215.
- 20 34. Guo Y, Hou J, Luo Y, Wang D (2013) Functional disruption of macrophage migration  
21 inhibitory factor (MIF) suppresses proliferation of human H460 lung cancer cells by  
22 caspase-dependent apoptosis. *Cancer Cell Int* 13: 28.
- 23 35. Fersching DM, Nagel D, Siegele B, Salat C, Heinemann V, et al. (2012) Apoptosis-related  
24 biomarkers sFAS, MIF, ICAM-1 and PAI-1 in serum of breast cancer patients  
25 undergoing neoadjuvant chemotherapy. *Anticancer Res* 32: 2047-2058.

- 1 36. Giannice R, Erreni M, Allavena P, Buscaglia M, Tozzi R (2013) Chemokines mRNA  
2 expression in relation to the Macrophage Migration Inhibitory Factor (MIF) mRNA  
3 and Vascular Endothelial Growth Factor (VEGF) mRNA expression in the  
4 microenvironment of endometrial cancer tissue and normal endometrium: a pilot study.  
5 *Cytokine* 64: 509-515.
- 6 37. Li J, Bosch-Marce M, Nanayakkara A, Savransky V, Fried SK, et al. (2006) Altered  
7 metabolic responses to intermittent hypoxia in mice with partial deficiency of  
8 hypoxia-inducible factor-1alpha. *Physiol Genomics* 25: 450-457.
- 9 38. Zhang Y, Wang H, Zhang J, Lv J, Huang Y (2013) Positive feedback loop and synergistic  
10 effects between hypoxia-inducible factor-2alpha and stearoyl-CoA desaturase-1  
11 promote tumorigenesis in clear cell renal cell carcinoma. *Cancer Sci* 104: 416-422.
- 12 39. Igal RA (2010) Stearoyl-CoA desaturase-1: a novel key player in the mechanisms of cell  
13 proliferation, programmed cell death and transformation to cancer. *Carcinogenesis* 31:  
14 1509-1515.
- 15 40. Igal RA (2011) Roles of StearoylCoA Desaturase-1 in the Regulation of Cancer Cell  
16 Growth, Survival and Tumorigenesis. *Cancers* 3: 2462-2477.
- 17 41. Gilkes DM, Bajpai S, Chaturvedi P, Wirtz D, Semenza GL (2013) Hypoxia-inducible  
18 factor 1 (HIF-1) promotes extracellular matrix remodeling under hypoxic conditions  
19 by inducing P4HA1, P4HA2, and PLOD2 expression in fibroblasts. *J Biol Chem* 288:  
20 10819-10829.
- 21 42. Semenza GL, Jiang BH, Leung SW, Passantino R, Concordet JP, et al. (1996) Hypoxia  
22 response elements in the aldolase A, enolase 1, and lactate dehydrogenase A gene  
23 promoters contain essential binding sites for hypoxia-inducible factor 1. *J Biol Chem*  
24 271: 32529-32537.
- 25 43. Ray R, Miller DM (1991) Cloning and characterization of a human c-myc

- 1 promoter-binding protein. *Mol Cell Biol* 11: 2154-2161.
- 2 44. Lo Presti M, Ferro A, Contino F, Mazzeola C, Sbacchi S, et al. (2010) Myc  
3 promoter-binding protein-1 (MBP-1) is a novel potential prognostic marker in  
4 invasive ductal breast carcinoma. *PLoS One* 5: e12961.
- 5 45. Trojanowicz B, Winkler A, Hammje K, Chen Z, Sekulla C, et al. (2009) Retinoic  
6 acid-mediated down-regulation of ENO1/MBP-1 gene products caused decreased  
7 invasiveness of the follicular thyroid carcinoma cell lines. *J Mol Endocrinol* 42:  
8 249-260.
- 9 46. Chang YS, Wu W, Walsh G, Hong WK, Mao L (2003) Enolase-alpha is frequently  
10 down-regulated in non-small cell lung cancer and predicts aggressive biological  
11 behavior. *Clin Cancer Res* 9: 3641-3644.
- 12 47. Ghosh AK, Steele R, Ryerse J, Ray RB (2006) Tumor-suppressive effects of MBP-1 in  
13 non-small cell lung cancer cells. *Cancer Res* 66: 11907-11912.
- 14 48. Ejeskar K, Krona C, Caren H, Zaibak F, Li L, et al. (2005) Introduction of in vitro  
15 transcribed ENO1 mRNA into neuroblastoma cells induces cell death. *BMC Cancer* 5:  
16 161.
- 17 49. Hsu KW, Hsieh RH, Wu CW, Chi CW, Lee YH, et al. (2009) MBP-1 suppresses growth  
18 and metastasis of gastric cancer cells through COX-2. *Mol Biol Cell* 20: 5127-5137.
- 19 50. Gao J, Zhao R, Xue Y, Niu Z, Cui K, et al. (2013) Role of enolase-1 in response to  
20 hypoxia in breast cancer: exploring the mechanisms of action. *Oncol Rep* 29:  
21 1322-1332.
- 22 51. Stany MP, Vathipadiekal V, Ozbun L, Stone RL, Mok SC, et al. (2011) Identification of  
23 novel therapeutic targets in microdissected clear cell ovarian cancers. *PLoS One* 6:  
24 e21121.
- 25 52. Gilkes DM, Chaturvedi P, Bajpai S, Wong CC, Wei H, et al. (2013) Collagen prolyl

- 1 hydroxylases are essential for breast cancer metastasis. *Cancer Res* 73: 3285-3296.
- 2 53. Francis P, Namlos HM, Muller C, Eden P, Fernebro J, et al. (2007) Diagnostic and  
3 prognostic gene expression signatures in 177 soft tissue sarcomas: hypoxia-induced  
4 transcription profile signifies metastatic potential. *BMC Genomics* 8: 73.
- 5 54. Miettinen M (2014) Immunohistochemistry of soft tissue tumours - review with emphasis  
6 on 10 markers. *Histopathology* 64: 101-118.
- 7 55. Stella CC, Cazzola M, De Fabritiis P, De Vincentiis A, Gianni AM, et al. (1995)  
8 CD34-positive cells: biology and clinical relevance. *Haematologica* 80: 367-387.
- 9 56. Strippoli P, Pelleri MC, Caracausi M, Vitale L, Piovesan A, et al. (2013) An integrated  
10 route to identifying new pathogenesis-based therapeutic approaches for trisomy 21  
11 (Down Syndrome) following the thought of Jérôme Lejeune. *Science postprint* 1:  
12 e00010.
- 13 57. Siemerink MJ, Klaassen I, Vogels IM, Griffioen AW, Van Noorden CJ, et al. (2012)  
14 CD34 marks angiogenic tip cells in human vascular endothelial cell cultures.  
15 *Angiogenesis* 15: 151-163.
- 16 58. Mineo TC, Ambrogi V, Baldi A, Rabitti C, Bollero P, et al. (2004) Prognostic impact of  
17 VEGF, CD31, CD34, and CD105 expression and tumour vessel invasion after radical  
18 surgery for IB-IIA non-small cell lung cancer. *J Clin Pathol* 57: 591-597.
- 19 59. Heimburg S, Oehler MK, Papadopoulos T, Caffier H, Kristen P, et al. (1999) Prognostic  
20 relevance of the endothelial marker CD 34 in ovarian cancer. *Anticancer Res* 19:  
21 2527-2529.
- 22 60. Leek RD (2001) The prognostic role of angiogenesis in breast cancer. *Anticancer Res* 21:  
23 4325-4331.
- 24 61. Bettencourt MC, Bauer JJ, Sesterhenn IA, Connelly RR, Moul JW (1998) CD34  
25 immunohistochemical assessment of angiogenesis as a prognostic marker for prostate



- 1 cancer recurrence after radical prostatectomy. *J Urol* 160: 459-465.
- 2 62. Thomas X, Archimbaud E, Charrin C, Magaud JP, Fiere D (1995) CD34 expression is  
3 associated with major adverse prognostic factors in adult acute lymphoblastic  
4 leukemia. *Leukemia* 9: 249-253.
- 5 63. Wen ST, Van Etten RA (1997) The PAG gene product, a stress-induced protein with  
6 antioxidant properties, is an Abl SH3-binding protein and a physiological inhibitor of  
7 c-Abl tyrosine kinase activity. *Genes Dev* 11: 2456-2467.
- 8 64. Mu ZM, Yin XY, Prochownik EV (2002) Pag, a putative tumor suppressor, interacts with  
9 the Myc Box II domain of c-Myc and selectively alters its biological function and  
10 target gene expression. *J Biol Chem* 277: 43175-43184.
- 11 65. Riddell JR, Maier P, Sass SN, Moser MT, Foster BA, et al. (2012) Peroxiredoxin 1  
12 stimulates endothelial cell expression of VEGF via TLR4 dependent activation of  
13 HIF-1alpha. *PLoS One* 7: e50394.
- 14 66. van Uden P, Kenneth NS, Rocha S (2008) Regulation of hypoxia-inducible factor-1alpha  
15 by NF-kappaB. *Biochem J* 412: 477-484.
- 16 67. Hoshino I, Matsubara H, Akutsu Y, Nishimori T, Yoneyama Y, et al. (2007) Tumor  
17 suppressor Prdx1 is a prognostic factor in esophageal squamous cell carcinoma  
18 patients. *Oncol Rep* 18: 867-871.
- 19 68. Kim JH, Bogner PN, Baek SH, Ramnath N, Liang P, et al. (2008) Up-regulation of  
20 peroxiredoxin 1 in lung cancer and its implication as a prognostic and therapeutic  
21 target. *Clin Cancer Res* 14: 2326-2333.
- 22 69. Chung KH, Lee DH, Kim Y, Kim TH, Huh JH, et al. (2010) Proteomic identification of  
23 overexpressed PRDX 1 and its clinical implications in ovarian carcinoma. *J Proteome*  
24 *Res* 9: 451-457.
- 25 70. Yonglitthipagon P, Pairojkul C, Chamgramol Y, Loukas A, Mulvenna J, et al. (2012)

- 1 Prognostic significance of peroxiredoxin 1 and ezrin-radixin-moesin-binding  
2 phosphoprotein 50 in cholangiocarcinoma. *Hum Pathol* 43: 1719-1730.
- 3 71. Li J, Yang ZL, Ren X, Zou Q, Yuan Y, et al. (2013) ILK and PRDX1 are prognostic  
4 markers in squamous cell/adenosquamous carcinomas and adenocarcinoma of  
5 gallbladder. *Tumour Biol* 34: 359-368.
- 6 72. Lee MJ, Kim JY, Suk K, Park JH (2004) Identification of the hypoxia-inducible factor 1  
7 alpha-responsive HGTD-P gene as a mediator in the mitochondrial apoptotic pathway.  
8 *Mol Cell Biol* 24: 3918-3927.
- 9 73. Kim JY, Kim SM, Ko JH, Yim JH, Park JH (2006) Interaction of pro-apoptotic protein  
10 HGTD-P with heat shock protein 90 is required for induction of mitochondrial  
11 apoptotic cascades. *FEBS Lett* 580: 3270-3275.
- 12 74. Lu X, Borchers AG, Jolicoeur C, Rayburn H, Baker JC, et al. (2004) PTK7/CCK-4 is a  
13 novel regulator of planar cell polarity in vertebrates. *Nature* 430: 93-98.
- 14 75. Peradziryi H, Kaplan NA, Podleschny M, Liu X, Wehner P, et al. (2011) PTK7/Otk  
15 interacts with Wnts and inhibits canonical Wnt signalling. *EMBO J* 30: 3729-3740.
- 16 76. Hayes M, Naito M, Daulat A, Angers S, Ciruna B (2013) Ptk7 promotes non-canonical  
17 Wnt/PCP-mediated morphogenesis and inhibits Wnt/beta-catenin-dependent cell fate  
18 decisions during vertebrate development. *Development* 140: 1807-1818.
- 19 77. Meng L, Sefah K, O'Donoghue MB, Zhu G, Shanguan D, et al. (2010) Silencing of  
20 PTK7 in colon cancer cells: caspase-10-dependent apoptosis via mitochondrial  
21 pathway. *PLoS One* 5: e14018.
- 22 78. Gobble RM, Qin LX, Brill ER, Angeles CV, Ugras S, et al. (2011) Expression profiling of  
23 liposarcoma yields a multigene predictor of patient outcome and identifies genes that  
24 contribute to liposarcomagenesis. *Cancer Res* 71: 2697-2705.
- 25 79. Shin WS, Kwon J, Lee HW, Kang MC, Na HW, et al. (2013) Oncogenic role of protein

- 1 tyrosine kinase 7 in esophageal squamous cell carcinoma. *Cancer Sci* 104: 1120-1126.
- 2 80. Lin Y, Zhang LH, Wang XH, Xing XF, Cheng XJ, et al. (2012) PTK7 as a novel marker  
3 for favorable gastric cancer patient survival. *J Surg Oncol* 106: 880-886.
- 4 81. Endoh H, Tomida S, Yatabe Y, Konishi H, Osada H, et al. (2004) Prognostic model of  
5 pulmonary adenocarcinoma by expression profiling of eight genes as determined by  
6 quantitative real-time reverse transcriptase polymerase chain reaction. *J Clin Oncol*  
7 22: 811-819.
- 8 82. Prebet T, Lhoumeau AC, Arnoulet C, Aulas A, Marchetto S, et al. (2010) The cell polarity  
9 PTK7 receptor acts as a modulator of the chemotherapeutic response in acute myeloid  
10 leukemia and impairs clinical outcome. *Blood* 116: 2315-2323.
- 11 83. Ataseven B, Angerer R, Kates R, Gunesch A, Knyazev P, et al. (2013) PTK7 expression  
12 in triple-negative breast cancer. *Anticancer Res* 33: 3759-3763.
- 13 84. Gartner S, Gunesch A, Knyazeva T, Wolf P, Hogel B, et al. (2014) PTK 7 Is a  
14 Transforming Gene and Prognostic Marker for Breast Cancer and Nodal Metastasis  
15 Involvement. *PLoS One* 9: e84472.
- 16 85. Bae I, Rih JK, Kim HJ, Kang HJ, Haddad B, et al. (2005) BRCA1 regulates gene  
17 expression for orderly mitotic progression. *Cell Cycle* 4: 1641-1666.
- 18 86. Pei L, Melmed S (1997) Isolation and characterization of a pituitary tumor-transforming  
19 gene (PTTG). *Mol Endocrinol* 11: 433-441.
- 20 87. Bernal JA, Luna R, Espina A, Lazaro I, Ramos-Morales F, et al. (2002) Human securin  
21 interacts with p53 and modulates p53-mediated transcriptional activity and apoptosis.  
22 *Nat Genet* 32: 306-311.
- 23 88. Minematsu T, Egashira N, Kajiya H, Takei M, Takekoshi S, et al. (2007) PTTG is a  
24 secretory protein in human pituitary adenomas and in mouse pituitary tumor cell lines.  
25 *Endocr Pathol* 18: 8-15.

- 1 89. Shibata Y, Haruki N, Kuwabara Y, Nishiwaki T, Kato J, et al. (2002) Expression of PTTG  
2 (pituitary tumor transforming gene) in esophageal cancer. *Jpn J Clin Oncol* 32:  
3 233-237.
- 4 90. Boelaert K, McCabe CJ, Tannahill LA, Gittoes NJ, Holder RL, et al. (2003) Pituitary  
5 tumor transforming gene and fibroblast growth factor-2 expression: potential  
6 prognostic indicators in differentiated thyroid cancer. *J Clin Endocrinol Metab* 88:  
7 2341-2347.
- 8 91. Solbach C, Roller M, Fellbaum C, Nicoletti M, Kaufmann M (2004) PTTG mRNA  
9 expression in primary breast cancer: a prognostic marker for lymph node invasion and  
10 tumor recurrence. *Breast* 13: 80-81.
- 11 92. Zhu X, Mao Z, Na Y, Guo Y, Wang X, et al. (2006) Significance of pituitary tumor  
12 transforming gene 1 (PTTG1) in prostate cancer. *Anticancer Res* 26: 1253-1259.
- 13 93. Fujii T, Nomoto S, Koshikawa K, Yatabe Y, Teshigawara O, et al. (2006) Overexpression  
14 of pituitary tumor transforming gene 1 in HCC is associated with angiogenesis and  
15 poor prognosis. *Hepatology* 43: 1267-1275.
- 16 94. Genkai N, Homma J, Sano M, Tanaka R, Yamanaka R (2006) Increased expression of  
17 pituitary tumor-transforming gene (PTTG)-1 is correlated with poor prognosis in  
18 glioma patients. *Oncol Rep* 15: 1569-1574.
- 19 95. Winnepeninckx V, Debiec-Rychter M, Belien JA, Fiten P, Michiels S, et al. (2006)  
20 Expression and possible role of hPTTG1/securin in cutaneous malignant melanoma.  
21 *Mod Pathol* 19: 1170-1180.
- 22 96. Solbach C, Roller M, Eckerdt F, Peters S, Knecht R (2006) Pituitary tumor-transforming  
23 gene expression is a prognostic marker for tumor recurrence in squamous cell  
24 carcinoma of the head and neck. *BMC Cancer* 6: 242.
- 25 97. Kim JW, Song JY, Lee JM, Lee JK, Lee NW, et al. (2008) Expression of pituitary

- 1 tumor-transforming gene in endometrial cancer as a prognostic marker. *Int J Gynecol*  
2 *Cancer* 18: 1352-1359.
- 3 98. Li H, Yin C, Zhang B, Sun Y, Shi L, et al. (2013) PTTG1 promotes migration and  
4 invasion of human non-small cell lung cancer cells and is modulated by miR-186.  
5 *Carcinogenesis* 34: 2145-2155.
- 6 99. Zhong X, Liu L, Zhao A, Pfeifer GP, Xu X (2005) The abnormal spindle-like,  
7 microcephaly-associated (ASPM) gene encodes a centrosomal protein. *Cell Cycle* 4:  
8 1227-1229.
- 9 100. Kato TA, Okayasu R, Jeggo PA, Fujimori A (2011) ASPM influences DNA  
10 double-strand break repair and represents a potential target for radiotherapy. *Int J*  
11 *Radiat Biol* 87: 1189-1195.
- 12 101. Lin SY, Pan HW, Liu SH, Jeng YM, Hu FC, et al. (2008) ASPM is a novel marker for  
13 vascular invasion, early recurrence, and poor prognosis of hepatocellular carcinoma.  
14 *Clin Cancer Res* 14: 4814-4820.
- 15 102. Kabbarah O, Nogueira C, Feng B, Nazarian RM, Bosenberg M, et al. (2010) Integrative  
16 genome comparison of primary and metastatic melanomas. *PLoS One* 5: e10770.
- 17 103. Wang WY, Hsu CC, Wang TY, Li CR, Hou YC, et al. (2013) A gene expression  
18 signature of epithelial tubulogenesis and a role for ASPM in pancreatic tumor  
19 progression. *Gastroenterology* 145: 1110-1120.
- 20 104. Komatsu M, Yoshimaru T, Matsuo T, Kiyotani K, Miyoshi Y, et al. (2013) Molecular  
21 features of triple negative breast cancer cells by genome-wide gene expression  
22 profiling analysis. *Int J Oncol* 42: 478-506.
- 23 105. Visnyei K, Onodera H, Damoiseaux R, Saigusa K, Petrosyan S, et al. (2011) A  
24 molecular screening approach to identify and characterize inhibitors of glioblastoma  
25 stem cells. *Mol Cancer Ther* 10: 1818-1828.

- 1 106. Bruning-Richardson A, Bond J, Alsiary R, Richardson J, Cairns DA, et al. (2011) ASPM  
2 and microcephalin expression in epithelial ovarian cancer correlates with tumour  
3 grade and survival. *Br J Cancer* 104: 1602-1610.
- 4 107. Weinstein J, Jacobsen FW, Hsu-Chen J, Wu T, Baum LG (1994) A novel mammalian  
5 protein, p55CDC, present in dividing cells is associated with protein kinase activity  
6 and has homology to the *Saccharomyces cerevisiae* cell division cycle proteins Cdc20  
7 and Cdc4. *Mol Cell Biol* 14: 3350-3363.
- 8 108. Weinstein J (1997) Cell cycle-regulated expression, phosphorylation, and degradation of  
9 p55Cdc. A mammalian homolog of CDC20/Fizzy/slp1. *J Biol Chem* 272:  
10 28501-28511.
- 11 109. Kidokoro T, Tanikawa C, Furukawa Y, Katagiri T, Nakamura Y, et al. (2008) CDC20, a  
12 potential cancer therapeutic target, is negatively regulated by p53. *Oncogene* 27:  
13 1562-1571.
- 14 110. Ouellet V, Guyot MC, Le Page C, Filali-Mouhim A, Lussier C, et al. (2006) Tissue array  
15 analysis of expression microarray candidates identifies markers associated with tumor  
16 grade and outcome in serous epithelial ovarian cancer. *Int J Cancer* 119: 599-607.
- 17 111. Kato T, Daigo Y, Aragaki M, Ishikawa K, Sato M, et al. (2012) Overexpression of  
18 CDC20 predicts poor prognosis in primary non-small cell lung cancer patients. *J Surg*  
19 *Oncol* 106: 423-430.
- 20 112. Wu WJ, Hu KS, Wang DS, Zeng ZL, Zhang DS, et al. (2013) CDC20 overexpression  
21 predicts a poor prognosis for patients with colorectal cancer. *J Transl Med* 11: 142.
- 22 113. Moura IM, Delgado ML, Silva PM, Lopes CA, do Amaral JB, et al. (2013) High CDC20  
23 expression is associated with poor prognosis in oral squamous cell carcinoma. *J Oral*  
24 *Pathol Med*.
- 25 114. Espinosa AM, Alfaro A, Roman-Basaure E, Guardado-Estrada M, Palma I, et al. (2013)

- 1 Mitosis is a source of potential markers for screening and survival and therapeutic  
2 targets in cervical cancer. PLoS One 8: e55975.
- 3 115. Choi JW, Kim Y, Lee JH, Kim YS (2013) High expression of spindle assembly  
4 checkpoint proteins CDC20 and MAD2 is associated with poor prognosis in urothelial  
5 bladder cancer. Virchows Arch 463: 681-687.
- 6 116. Chang DZ, Ma Y, Ji B, Liu Y, Hwu P, et al. (2012) Increased CDC20 expression is  
7 associated with pancreatic ductal adenocarcinoma differentiation and progression. J  
8 Hematol Oncol 5: 15.
- 9 117. Suzuki N, Hazama S, Ueno T, Matsui H, Shindo Y, et al. (2014) A Phase I Clinical Trial  
10 of Vaccination With KIF20A-derived Peptide in Combination With Gemcitabine For  
11 Patients With Advanced Pancreatic Cancer. J Immunother 37: 36-42.
- 12 118. Lee SH, McCormick F, Saya H (2010) Mad2 inhibits the mitotic kinesin MKlp2. J Cell  
13 Biol 191: 1069-1077.
- 14 119. Mondal G, Baral RN, Roychoudhury S (2006) A new Mad2-interacting domain of  
15 Cdc20 is critical for the function of Mad2-Cdc20 complex in the spindle assembly  
16 checkpoint. Biochem J 396: 243-253.
- 17 120. Groth-Pedersen L, Aits S, Corcelle-Termeau E, Petersen NH, Nylandsted J, et al. (2012)  
18 Identification of cytoskeleton-associated proteins essential for lysosomal stability and  
19 survival of human cancer cells. PLoS One 7: e45381.
- 20 121. Yan GR, Zou FY, Dang BL, Zhang Y, Yu G, et al. (2012) Genistein-induced mitotic  
21 arrest of gastric cancer cells by downregulating KIF20A, a proteomics study.  
22 Proteomics 12: 2391-2399.
- 23 122. Yamashita J, Fukushima S, Jinnin M, Honda N, Makino K, et al. (2012) Kinesin family  
24 member 20A is a novel melanoma-associated antigen. Acta Derm Venereol 92:  
25 593-597.

- 1 123. Taniuchi K, Nakagawa H, Nakamura T, Eguchi H, Ohigashi H, et al. (2005)  
2 Down-regulation of RAB6KIFL/KIF20A, a kinesin involved with membrane  
3 trafficking of discs large homologue 5, can attenuate growth of pancreatic cancer cell.  
4 Cancer Res 65: 105-112.
- 5 124. Garcia CK, Goldstein JL, Pathak RK, Anderson RG, Brown MS (1994) Molecular  
6 characterization of a membrane transporter for lactate, pyruvate, and other  
7 monocarboxylates: implications for the Cori cycle. Cell 76: 865-873.
- 8 125. Kasiappan R, Shih HJ, Chu KL, Chen WT, Liu HP, et al. (2009) Loss of p53 and MCT-1  
9 overexpression synergistically promote chromosome instability and tumorigenicity.  
10 Mol Cancer Res 7: 536-548.
- 11 126. De Saedeleer CJ, Copetti T, Porporato PE, Verrax J, Feron O, et al. (2012) Lactate  
12 activates HIF-1 in oxidative but not in Warburg-phenotype human tumor cells. PLoS  
13 One 7: e46571.
- 14 127. Sonveaux P, Copetti T, De Saedeleer CJ, Vegran F, Verrax J, et al. (2012) Targeting the  
15 lactate transporter MCT1 in endothelial cells inhibits lactate-induced HIF-1 activation  
16 and tumor angiogenesis. PLoS One 7: e33418.
- 17 128. Zhao Z, Wu MS, Zou C, Tang Q, Lu J, et al. (2014) Downregulation of MCT1 inhibits  
18 tumor growth, metastasis and enhances chemotherapeutic efficacy in osteosarcoma  
19 through regulation of the NF-kappaB pathway. Cancer Lett 342: 150-158.
- 20 129. Miranda-Goncalves V, Honavar M, Pinheiro C, Martinho O, Pires MM, et al. (2013)  
21 Monocarboxylate transporters (MCTs) in gliomas: expression and exploitation as  
22 therapeutic targets. Neuro Oncol 15: 172-188.
- 23 130. Polanski R, Hodgkinson C, Fusi A, Nonaka D, Priest L, et al. (2013) Activity of the  
24 Monocarboxylate Transporter 1 inhibitor AZD3965 in Small Cell Lung Cancer. Clin  
25 Cancer Res.



- 1 131. Curry JM, Tuluc M, Whitaker-Menezes D, Ames JA, Anantharaman A, et al. (2013)  
2 Cancer metabolism, stemness and tumor recurrence: MCT1 and MCT4 are functional  
3 biomarkers of metabolic symbiosis in head and neck cancer. *Cell Cycle* 12:  
4 1371-1384.
- 5 132. Izumi H, Takahashi M, Uramoto H, Nakayama Y, Oyama T, et al. (2011)  
6 Monocarboxylate transporters 1 and 4 are involved in the invasion activity of human  
7 lung cancer cells. *Cancer Sci* 102: 1007-1013.
- 8 133. Pinheiro C, Albergaria A, Paredes J, Sousa B, Dufloth R, et al. (2010) Monocarboxylate  
9 transporter 1 is up-regulated in basal-like breast carcinoma. *Histopathology* 56:  
10 860-867.
- 11 134. Pinheiro C, Longatto-Filho A, Scapulatempo C, Ferreira L, Martins S, et al. (2008)  
12 Increased expression of monocarboxylate transporters 1, 2, and 4 in colorectal  
13 carcinomas. *Virchows Arch* 452: 139-146.
- 14 135. Shimoyama Y, Akihara Y, Kirat D, Iwano H, Hirayama K, et al. (2007) Expression of  
15 monocarboxylate transporter 1 in oral and ocular canine melanocytic tumors. *Vet*  
16 *Pathol* 44: 449-457.
- 17 136. Masuda M, Maruyama T, Ohta T, Ito A, Hayashi T, et al. (2010) CADM1 interacts with  
18 Tiam1 and promotes invasive phenotype of human T-cell leukemia virus type  
19 I-transformed cells and adult T-cell leukemia cells. *J Biol Chem* 285: 15511-15522.
- 20 137. Masuda M, Yageta M, Fukuhara H, Kuramochi M, Maruyama T, et al. (2002) The tumor  
21 suppressor protein TSLC1 is involved in cell-cell adhesion. *J Biol Chem* 277:  
22 31014-31019.
- 23 138. Lu B, Di W, Wang H, Ma H, Li J, et al. (2012) Tumor suppressor TSLC1 is implicated  
24 in cell proliferation, invasion and apoptosis in laryngeal squamous cell carcinoma by  
25 regulating Akt signaling pathway. *Tumour Biol* 33: 2007-2017.

- 1 139. Fukami T, Fukuhara H, Kuramochi M, Maruyama T, Isogai K, et al. (2003) Promoter  
2 methylation of the TSLC1 gene in advanced lung tumors and various cancer cell lines.  
3 Int J Cancer 107: 53-59.
- 4 140. He G, Lei W, Wang S, Xiao R, Guo K, et al. (2012) Overexpression of tumor suppressor  
5 TSLC1 by a survivin-regulated oncolytic adenovirus significantly inhibits  
6 hepatocellular carcinoma growth. J Cancer Res Clin Oncol 138: 657-670.
- 7 141. Qin L, Zhu W, Xu T, Hao Y, Zhang Z, et al. (2007) Effect of TSLC1 gene on  
8 proliferation, invasion and apoptosis of human hepatocellular carcinoma cell line  
9 HepG2. J Huazhong Univ Sci Technolog Med Sci 27: 535-537.
- 10 142. Houshmandi SS, Surace EI, Zhang HB, Fuller GN, Gutmann DH (2006) Tumor  
11 suppressor in lung cancer-1 (TSLC1) functions as a glioma tumor suppressor.  
12 Neurology 67: 1863-1866.
- 13 143. Uchino K, Ito A, Wakayama T, Koma Y, Okada T, et al. (2003) Clinical implication and  
14 prognostic significance of the tumor suppressor TSLC1 gene detected in  
15 adenocarcinoma of the lung. Cancer 98: 1002-1007.
- 16 144. Malik TH, Shoichet SA, Latham P, Kroll TG, Peters LL, et al. (2001) Transcriptional  
17 repression and developmental functions of the atypical vertebrate GATA protein  
18 TRPS1. EMBO J 20: 1715-1725.
- 19 145. Chen JQ, Litton J, Xiao L, Zhang HZ, Warneke CL, et al. (2010) Quantitative  
20 immunohistochemical analysis and prognostic significance of TRPS-1, a new GATA  
21 transcription factor family member, in breast cancer. Horm Cancer 1: 21-33.
- 22 146. Bao Y, Ruan LJ, Mo JF (2013) Low trichorhinophalangeal syndrome 1 gene transcript  
23 levels in basal-like breast cancer associate with mesenchymal-to-epithelial transition.  
24 Chin Med Sci J 28: 129-134.
- 25 147. Hong J, Sun J, Huang T (2013) Increased expression of TRPS1 affects tumor

- 1 progression and correlates with patients' prognosis of colon cancer. *Biomed Res Int*  
2 2013: 454085.
- 3 148. Siple JD, Menninger JC, Hartley KO, Ward DC, Jackson SP, et al. (1995) Gene for the  
4 catalytic subunit of the human DNA-activated protein kinase maps to the site of the  
5 XRCC7 gene on chromosome 8. *Proc Natl Acad Sci USA* 92: 7515-7519.
- 6 149. Tomimatsu N, Mukherjee B, Burma S (2009) Distinct roles of ATR and DNA-PKcs in  
7 triggering DNA damage responses in ATM-deficient cells. *EMBO Rep* 10: 629-635.
- 8 150. Hill R, Madureira PA, Waisman DM, Lee PW (2011) DNA-PKCS binding to p53 on the  
9 p21WAF1/CIP1 promoter blocks transcription resulting in cell death. *Oncotarget* 2:  
10 1094-1108.
- 11 151. Someya M, Sakata KI, Matsumoto Y, Kamdar RP, Kai M, et al. (2011) The association  
12 of DNA-dependent protein kinase activity of peripheral blood lymphocytes with  
13 prognosis of cancer. *Br J Cancer* 104: 1724-1729.
- 14 152. Xing J, Wu X, Vaporciyan AA, Spitz MR, Gu J (2008) Prognostic significance of  
15 ataxia-telangiectasia mutated, DNA-dependent protein kinase catalytic subunit, and  
16 Ku heterodimeric regulatory complex 86-kD subunit expression in patients with  
17 nonsmall cell lung cancer. *Cancer* 112: 2756-2764.
- 18 153. Willmore E, Elliott SL, Mainou-Fowler T, Summerfield GP, Jackson GH, et al. (2008)  
19 DNA-dependent protein kinase is a therapeutic target and an indicator of poor  
20 prognosis in B-cell chronic lymphocytic leukemia. *Clin Cancer Res* 14: 3984-3992.
- 21 154. Malumbres M, Barbacid M (2005) Mammalian cyclin-dependent kinases. *Trends*  
22 *Biochem Sci* 30: 630-641.
- 23 155. Bunz F, Dutriaux A, Lengauer C, Waldman T, Zhou S, et al. (1998) Requirement for p53  
24 and p21 to sustain G2 arrest after DNA damage. *Science* 282: 1497-1501.
- 25 156. Wolowiec D, Berger F, Ffrench P, Bryon PA, Ffrench M (1999) CDK1 and cyclin A

- 1 expression is linked to cell proliferation and associated with prognosis in  
2 non-Hodgkin's lymphomas. *Leuk Lymphoma* 35: 147-157.
- 3 157. Perumal D, Singh S, Yoder SJ, Bloom GC, Chellappan SP (2012) A novel five gene  
4 signature derived from stem-like side population cells predicts overall and  
5 recurrence-free survival in NSCLC. *PLoS One* 7: e43589.
- 6 158. Willder JM, Heng SJ, McCall P, Adams CE, Tannahill C, et al. (2013) Androgen  
7 receptor phosphorylation at serine 515 by Cdk1 predicts biochemical relapse in  
8 prostate cancer patients. *Br J Cancer* 108: 139-148.
- 9 159. Linton A, Cheng YY, Griggs K, Kirschner MB, Gattani S, et al. (2013) An RNAi-based  
10 screen reveals PLK1, CDK1 and NDC80 as potential therapeutic targets in malignant  
11 pleural mesothelioma. *Br J Cancer*.
- 12 160. Kim SJ, Nakayama S, Miyoshi Y, Taguchi T, Tamaki Y, et al. (2008) Determination of  
13 the specific activity of CDK1 and CDK2 as a novel prognostic indicator for early  
14 breast cancer. *Ann Oncol* 19: 68-72.
- 15 161. Jeng JC, Lin YM, Lin CH, Shih HM (2009) Cdh1 controls the stability of TACC3. *Cell*  
16 *Cycle* 8: 3529-3536.
- 17 162. Partch CL, Gardner KH (2011) Coactivators necessary for transcriptional output of the  
18 hypoxia inducible factor, HIF, are directly recruited by ARNT PAS-B. *Proc Natl Acad*  
19 *Sci USA* 108: 7739-7744.
- 20 163. Piekorz RP, Hoffmeyer A, Dunsch CD, McKay C, Nakajima H, et al. (2002) The  
21 centrosomal protein TACC3 is essential for hematopoietic stem cell function and  
22 genetically interfaces with p53-regulated apoptosis. *EMBO J* 21: 653-664.
- 23 164. Jung CK, Jung JH, Park GS, Lee A, Kang CS, et al. (2006) Expression of transforming  
24 acidic coiled-coil containing protein 3 is a novel independent prognostic marker in  
25 non-small cell lung cancer. *Pathol Int* 56: 503-509.

- 1 165. Yim EK, Tong SY, Ho EM, Bae JH, Um SJ, et al. (2009) Anticancer effects on TACC3  
2 by treatment of paclitaxel in HPV-18 positive cervical carcinoma cells. *Oncol Rep* 21:  
3 549-557.
- 4 166. Duncan CG, Killela PJ, Payne CA, Lampson B, Chen WC, et al. (2010) Integrated  
5 genomic analyses identify ERFFI1 and TACC3 as glioblastoma-targeted genes.  
6 *Oncotarget* 1: 265-277.
- 7 167. Shao GZ, Zhou RL, Zhang QY, Zhang Y, Liu JJ, et al. (2003) Molecular cloning and  
8 characterization of LAPTM4B, a novel gene upregulated in hepatocellular carcinoma.  
9 *Oncogene* 22: 5060-5069.
- 10 168. Li Y, Zhang Q, Tian R, Wang Q, Zhao JJ, et al. (2011) Lysosomal transmembrane  
11 protein LAPTM4B promotes autophagy and tolerance to metabolic stress in cancer  
12 cells. *Cancer Res* 71: 7481-7489.
- 13 169. Li L, Wei XH, Pan YP, Li HC, Yang H, et al. (2010) LAPTM4B: a novel  
14 cancer-associated gene motivates multidrug resistance through efflux and activating  
15 PI3K/AKT signaling. *Oncogene* 29: 5785-5795.
- 16 170. Yang H, Xiong F, Wei X, Yang Y, McNutt MA, et al. (2010) Overexpression of  
17 LAPTM4B-35 promotes growth and metastasis of hepatocellular carcinoma in vitro  
18 and in vivo. *Cancer Lett* 294: 236-244.
- 19 171. Xiao M, Jia S, Wang H, Wang J, Huang Y, et al. (2013) Overexpression of LAPTM4B:  
20 an independent prognostic marker in breast cancer. *J Cancer Res Clin Oncol* 139:  
21 661-667.
- 22 172. Kang Y, Yin M, Jiang W, Zhang H, Xia B, et al. (2012) Overexpression of  
23 LAPTM4B-35 is associated with poor prognosis in colorectal carcinoma. *Am J Surg*  
24 204: 677-683.
- 25 173. Yin M, Lou C, Zhang W, Meng F, Zhang H, et al. (2012) LAPTM4B overexpression is a

- 1 novel independent prognostic marker for metastatic ovarian tumors. *Int J Gynecol*  
2 *Cancer* 22: 54-62.
- 3 174. Zhou L, He XD, Cui QC, Zhou WX, Qu Q, et al. (2008) Expression of LAPTM4B-35: a  
4 novel marker of progression, invasiveness and poor prognosis of extrahepatic  
5 cholangiocarcinoma. *Cancer Lett* 264: 209-217.
- 6 175. Krishnamachary B, Berg-Dixon S, Kelly B, Agani F, Feldser D, et al. (2003) Regulation  
7 of colon carcinoma cell invasion by hypoxia-inducible factor 1. *Cancer Res* 63:  
8 1138-1143.
- 9 176. Lou X, Han X, Jin C, Tian W, Yu W, et al. (2013) SOX2 targets fibronectin 1 to promote  
10 cell migration and invasion in ovarian cancer: new molecular leads for therapeutic  
11 intervention. *OMICS* 17: 510-518.
- 12 177. Helleman J, Jansen MP, Ruigrok-Ritstier K, van Staveren IL, Look MP, et al. (2008)  
13 Association of an extracellular matrix gene cluster with breast cancer prognosis and  
14 endocrine therapy response. *Clin Cancer Res* 14: 5555-5564.
- 15 178. Waalkes S, Atschekzei F, Kramer MW, Hennenlotter J, Vetter G, et al. (2010)  
16 Fibronectin 1 mRNA expression correlates with advanced disease in renal cancer.  
17 *BMC Cancer* 10: 503.
- 18 179. Nusinow DA, Sharp JA, Morris A, Salas S, Plath K, et al. (2007) The histone domain of  
19 macroH2A1 contains several dispersed elements that are each sufficient to direct  
20 enrichment on the inactive X chromosome. *J Mol Biol* 371: 11-18.
- 21 180. Riballo E, Kuhne M, Rief N, Doherty A, Smith GC, et al. (2004) A pathway of  
22 double-strand break rejoining dependent upon ATM, Artemis, and proteins locating to  
23 gamma-H2AX foci. *Mol Cell* 16: 715-724.
- 24 181. Blattmann C, Oertel S, Thiemann M, Weber KJ, Schmezer P, et al. (2012)  
25 Suberoylanilide hydroxamic acid affects gammaH2AX expression in osteosarcoma,

- 1 atypical teratoid rhabdoid tumor and normal tissue cell lines after irradiation.  
2 Strahlenther Onkol 188: 168-176.
- 3 182. Li X, Kuang J, Shen Y, Majer MM, Nelson CC, et al. (2012) The atypical histone  
4 macroH2A1.2 interacts with HER-2 protein in cancer cells. J Biol Chem 287:  
5 23171-23183.
- 6 183. Sengupta S, Robles AI, Linke SP, Sinogeeva NI, Zhang R, et al. (2004) Functional  
7 interaction between BLM helicase and 53BP1 in a Chk1-mediated pathway during  
8 S-phase arrest. J Cell Biol 166: 801-813.
- 9 184. Fernandez-Capetillo O, Chen HT, Celeste A, Ward I, Romanienko PJ, et al. (2002) DNA  
10 damage-induced G2-M checkpoint activation by histone H2AX and 53BP1. Nat Cell  
11 Biol 4: 993-997.
- 12 185. Ward IM, Minn K, Jorda KG, Chen J (2003) Accumulation of checkpoint protein 53BP1  
13 at DNA breaks involves its binding to phosphorylated histone H2AX. J Biol Chem  
14 278: 19579-19582.
- 15 186. Mallery DL, Vandenberg CJ, Hiom K (2002) Activation of the E3 ligase function of the  
16 BRCA1/BARD1 complex by polyubiquitin chains. EMBO J 21: 6755-6762.
- 17 187. Paull TT, Rogakou EP, Yamazaki V, Kirchgessner CU, Gellert M, et al. (2000) A critical  
18 role for histone H2AX in recruitment of repair factors to nuclear foci after DNA  
19 damage. Curr Biol 10: 886-895.
- 20 188. Chen A, Kleiman FE, Manley JL, Ouchi T, Pan ZQ (2002) Autoubiquitination of the  
21 BRCA1\*BARD1 RING ubiquitin ligase. J Biol Chem 277: 22085-22092.
- 22 189. Fragkos M, Jurvansuu J, Beard P (2009) H2AX is required for cell cycle arrest via the  
23 p53/p21 pathway. Mol Cell Biol 29: 2828-2840.
- 24 190. Sporn JC, Jung B (2012) Differential regulation and predictive potential of MacroH2A1  
25 isoforms in colon cancer. Am J Pathol 180: 2516-2526.

- 1 191. Matthaios D, Foukas PG, Kefala M, Hountis P, Trypsianis G, et al. (2012)  
2 gamma-H2AX expression detected by immunohistochemistry correlates with  
3 prognosis in early operable non-small cell lung cancer. *Onco Targets Ther* 5: 309-314.
- 4 192. Nagelkerke A, van Kuijk SJ, Sweep FC, Nagtegaal ID, Hoogerbrugge N, et al. (2011)  
5 Constitutive expression of gamma-H2AX has prognostic relevance in triple negative  
6 breast cancer. *Radiother Oncol* 101: 39-45.
- 7 193. Brunner AH, Hinterholzer S, Riss P, Heinze G, Weiss K, et al. (2011) Expression of  
8 gamma-H2AX in endometrial carcinomas: an immunohistochemical study with p53.  
9 *Gynecol Oncol* 121: 206-211.
- 10 194. Schindler C, Fu XY, Improta T, Aebersold R, Darnell JE, Jr. (1992) Proteins of  
11 transcription factor ISGF-3: one gene encodes the 91- and 84-kDa ISGF-3 proteins that  
12 are activated by interferon alpha. *Proc Natl Acad Sci USA* 89: 7836-7839.
- 13 195. Darnell JE, Jr., Kerr IM, Stark GR (1994) Jak-STAT pathways and transcriptional  
14 activation in response to IFNs and other extracellular signaling proteins. *Science* 264:  
15 1415-1421.
- 16 196. Ihle JN, Kerr IM (1995) Jaks and Stats in signaling by the cytokine receptor superfamily.  
17 *Trends Genet* 11: 69-74.
- 18 197. Stark GR, Kerr IM, Williams BR, Silverman RH, Schreiber RD (1998) How cells  
19 respond to interferons. *Annu Rev Biochem* 67: 227-264.
- 20 198. Adamkova L, Souckova K, Kovarik J (2007) Transcription protein STAT1: biology and  
21 relation to cancer. *Folia Biol (Praha)* 53: 1-6.
- 22 199. Kramer OH, Baus D, Knauer SK, Stein S, Jager E, et al. (2006) Acetylation of Stat1  
23 modulates NF-kappaB activity. *Genes Dev* 20: 473-485.
- 24 200. Townsend PA, Scarabelli TM, Davidson SM, Knight RA, Latchman DS, et al. (2004)  
25 STAT-1 interacts with p53 to enhance DNA damage-induced apoptosis. *J Biol Chem*



- 1           279: 5811-5820.
- 2   201. Ivanov SV, Salnikow K, Ivanova AV, Bai L, Lerman MI (2007) Hypoxic repression of  
3           STAT1 and its downstream genes by a pVHL/HIF-1 target DEC1/STRA13. *Oncogene*  
4           26: 802-812.
- 5   202. Widschwendter A, Tonko-Geymayer S, Welte T, Daxenbichler G, Marth C, et al. (2002)  
6           Prognostic significance of signal transducer and activator of transcription 1 activation  
7           in breast cancer. *Clin Cancer Res* 8: 3065-3074.
- 8   203. Watanabe G, Kaganoi J, Imamura M, Shimada Y, Itami A, et al. (2001) Progression of  
9           esophageal carcinoma by loss of EGF-STAT1 pathway. *Cancer J* 7: 132-139.
- 10   204. Chen HY, Yu SL, Chen CH, Chang GC, Chen CY, et al. (2007) A five-gene signature  
11           and clinical outcome in non-small-cell lung cancer. *N Engl J Med* 356: 11-20.
- 12   205. Gordziel C, Bratsch J, Moriggl R, Knosel T, Friedrich K (2013) Both STAT1 and  
13           STAT3 are favourable prognostic determinants in colorectal carcinoma. *Br J Cancer*  
14           109: 138-146.
- 15   206. Hix LM, Karavitis J, Khan MW, Shi YH, Khazaie K, et al. (2013) Tumor STAT1  
16           transcription factor activity enhances breast tumor growth and immune suppression  
17           mediated by myeloid-derived suppressor cells. *J Biol Chem* 288: 11676-11688.
- 18   207. Dong J, Li J, Liu SM, Feng XY, Chen S, et al. (2013) CD33(+)/p-STAT1(+)  
19           double-positive cell as a prognostic factor for stage IIIa gastric cancer. *Med Oncol* 30:  
20           442.
- 21   208. Couet J, Sargiacomo M, Lisanti MP (1997) Interaction of a receptor tyrosine kinase,  
22           EGF-R, with caveolins. Caveolin binding negatively regulates tyrosine and  
23           serine/threonine kinase activities. *J Biol Chem* 272: 30429-30438.
- 24   209. Goetz JG, Lajoie P, Wiseman SM, Nabi IR (2008) Caveolin-1 in tumor progression: the  
25           good, the bad and the ugly. *Cancer Metastasis Rev* 27: 715-735.

- 1 210. Lee H, Park DS, Wang XB, Scherer PE, Schwartz PE, et al. (2002) Src-induced  
2 phosphorylation of caveolin-2 on tyrosine 19. Phospho-caveolin-2 (Tyr(P)19) is  
3 localized near focal adhesions, remains associated with lipid rafts/caveolae, but no  
4 longer forms a high molecular mass hetero-oligomer with caveolin-1. *J Biol Chem*  
5 277: 34556-34567.
- 6 211. Treff NR, Pouchnik D, Dement GA, Britt RL, Reeves R (2004) High-mobility group  
7 A1a protein regulates Ras/ERK signaling in MCF-7 human breast cancer cells.  
8 *Oncogene* 23: 777-785.
- 9 212. Quann K, Gonzales DM, Mercier I, Wang C, Sotgia F, et al. (2013) Caveolin-1 is a  
10 negative regulator of tumor growth in glioblastoma and modulates chemosensitivity to  
11 temozolomide. *Cell Cycle* 12: 1510-1520.
- 12 213. Ando T, Ishiguro H, Kimura M, Mitsui A, Mori Y, et al. (2007) The overexpression of  
13 caveolin-1 and caveolin-2 correlates with a poor prognosis and tumor progression in  
14 esophageal squamous cell carcinoma. *Oncol Rep* 18: 601-609.
- 15 214. Sagara Y, Mimori K, Yoshinaga K, Tanaka F, Nishida K, et al. (2004) Clinical  
16 significance of Caveolin-1, Caveolin-2 and HER2/neu mRNA expression in human  
17 breast cancer. *Br J Cancer* 91: 959-965.
- 18 215. Nimri L, Barak H, Graeve L, Schwartz B (2013) Restoration of caveolin-1 expression  
19 suppresses growth, membrane-type-4 metalloproteinase expression and  
20 metastasis-associated activities in colon cancer cells. *Mol Carcinog* 52: 859-870.
- 21 216. Parat MO, Riggins GJ (2012) Caveolin-1, caveolae, and glioblastoma. *Neuro Oncol* 14:  
22 679-688.
- 23 217. Pancotti F, Roncuzzi L, Maggiolini M, Gasperi-Campani A (2012) Caveolin-1 silencing  
24 arrests the proliferation of metastatic lung cancer cells through the inhibition of  
25 STAT3 signaling. *Cell Signal* 24: 1390-1397.

- 1 218. Jones JJ, Clemmons DR (1995) Insulin-like growth factors and their binding proteins:  
2 biological actions. *Endocr Rev* 16: 3-34.
- 3 219. LeRoith D, Werner H, Beitner-Johnson D, Roberts CT, Jr. (1995) Molecular and cellular  
4 aspects of the insulin-like growth factor I receptor. *Endocr Rev* 16: 143-163.
- 5 220. Rechler MM (1993) Insulin-like growth factor binding proteins. *Vitam Horm* 47: 1-114.
- 6 221. Moreno MJ, Ball M, Andrade MF, McDermid A, Stanimirovic DB (2006) Insulin-like  
7 growth factor binding protein-4 (IGFBP-4) is a novel anti-angiogenic and  
8 anti-tumorigenic mediator secreted by dibutyryl cyclic AMP  
9 (dB-cAMP)-differentiated glioblastoma cells. *Glia* 53: 845-857.
- 10 222. Diehl D, Hoeflich A, Wolf E, Lahm H (2004) Insulin-like growth factor (IGF)-binding  
11 protein-4 inhibits colony formation of colorectal cancer cells by IGF-independent  
12 mechanisms. *Cancer Res* 64: 1600-1603.
- 13 223. Ueno K, Hirata H, Majid S, Tabatabai ZL, Hinoda Y, et al. (2011) IGFBP-4 activates the  
14 Wnt/beta-catenin signaling pathway and induces M-CAM expression in human renal  
15 cell carcinoma. *Int J Cancer* 129: 2360-2369.
- 16 224. Sato H, Sakaeda M, Ishii J, Kashiwagi K, Shimoyamada H, et al. (2011) Insulin-like  
17 growth factor binding protein-4 gene silencing in lung adenocarcinomas. *Pathol Int*  
18 61: 19-27.
- 19  
20
